# Supplementary material for: Carbon dots from roasted chicken accumulate in lysosomes and induce lysosome-dependent cell death
Source: Royal Society of Chemistry journal article supplement (doi:10.1039/d0fo02144j), 2020-01-01
Supplement: d0fo02144j1.pdf [file d0fo02144j1.pdf]

1 Supplementary data:

2 Carbon dots from roasted chicken accumulated  
3 in lysosome and induced lysosome-dependent  
4 cell death

5 *Yanyang Wu<sup>ab</sup>, Xunyu Song<sup>a</sup>, Nanying Wang<sup>a</sup>, Shuang Cong<sup>a</sup>, Xue Zhao<sup>a</sup>, Rewa Rai<sup>c</sup>*  
6 *and Mingqian Tan<sup>ac\*</sup>*

7 <sup>a</sup>School of Food Science and Technology, National Engineering Research Center of  
8 Seafood, Collaborative Innovation Center of Seafood Deep Processing, Dalian  
9 Polytechnic University, Dalian 116034, P. R. China.

10 <sup>b</sup> College of Food Science and Technology, Hunan Agricultural University, Changsha  
11 410128, Hunan, P. R. China.

12 <sup>c</sup> Department of Food Science and Technology, University of California-Davis, Davis,  
13 CA 95616, USA.

14 \*To whom correspondence should be addressed. Tel &Fax: +86-411-86318657. Email:  
15 2468750030@qq.com.

16

17

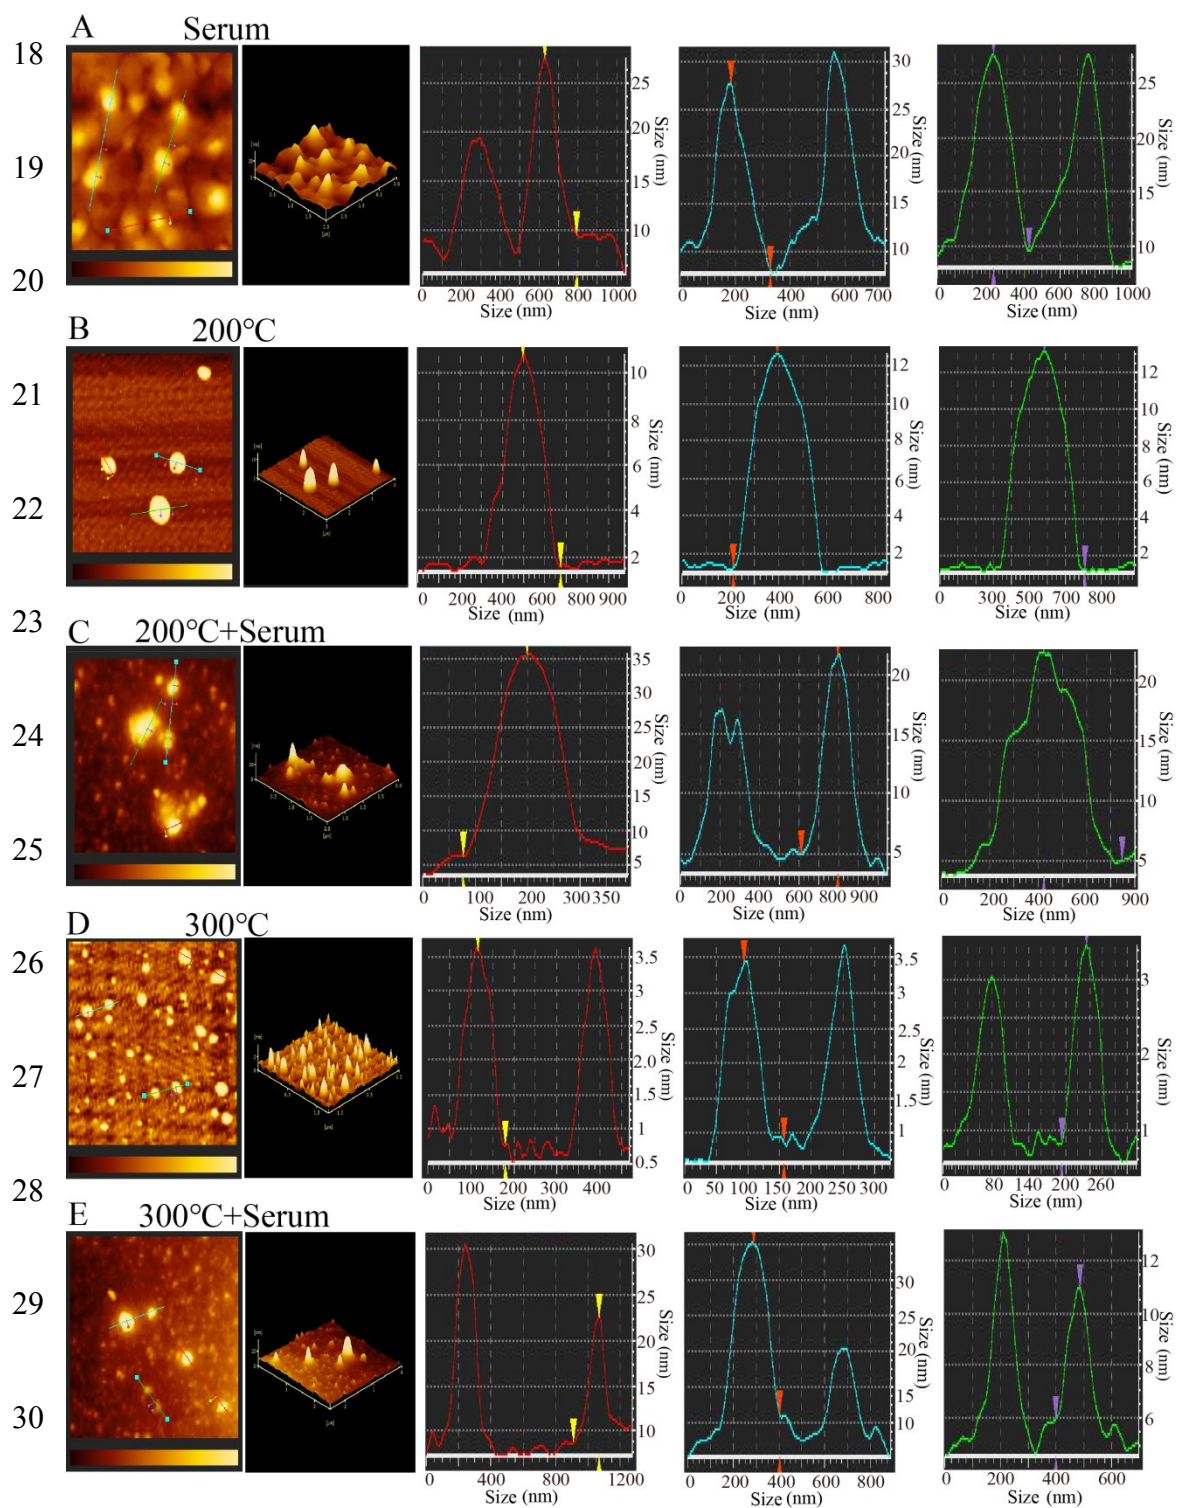

32 **Fig. S1 Aggregation of CDs in full medium.** (A) The DMEM with 10 % FBS were  
 33 cultured in 37 °C, 5 % CO<sub>2</sub> for 2 h and scanned by atomic force microscopy (AFM).  
 34 (B) CDs from the chicken breasts heated at 200 °C were cultured with serum free

35 medium in 37 °C, 5 % CO<sub>2</sub> for 2 h and scanned by AFM. (C) CDs from the chicken  
36 breasts heated at 200 °C were cultured with full medium in 37 °C, 5 % CO<sub>2</sub> for 2 h and  
37 scanned by AFM. (D) CDs from the chicken breasts heated at 300 °C were cultured  
38 with serum free medium in 37 °C, 5 % CO<sub>2</sub> for 2 h and scanned by AFM. (E) CDs from  
39 the chicken breasts heated at 300 °C were cultured with full medium in 37 °C, 5 % CO<sub>2</sub>  
40 for 2 h and scanned by AFM.

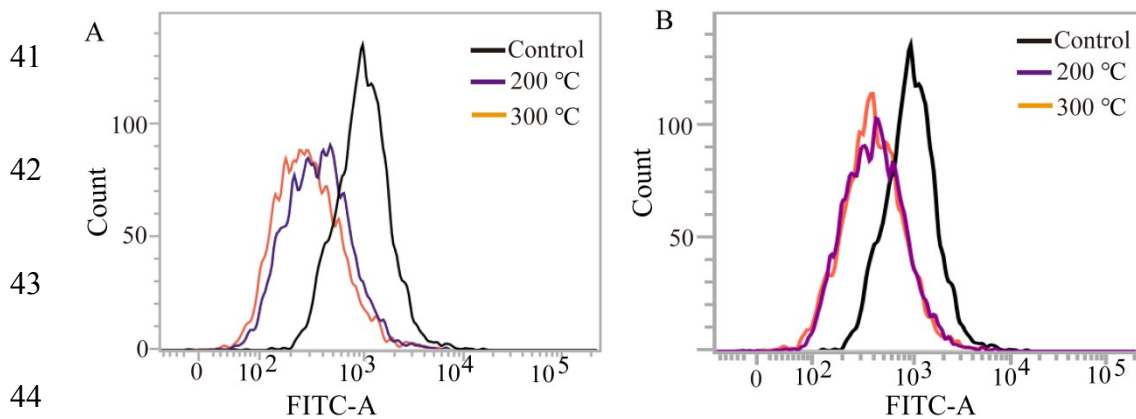

45 **Fig. S2 CDs increased pH of lysosome in Caco-2 cells.** (A) The Caco-2 cells were  
46 treated with 3 mg/mL CDs from the chicken breasts heated at 200 or 300 °C for 3 h.  
47 (B) The Caco-2 cells were treated with 1 mg/mL CDs from the chicken breasts heated  
48 at 200 or 300 °C for 3 h. The lysosomal pH was analyzed by flow cytometry after  
49 stained with 10 µg/mL LysoSensor DND189 for 30 min.

50

51

52

53

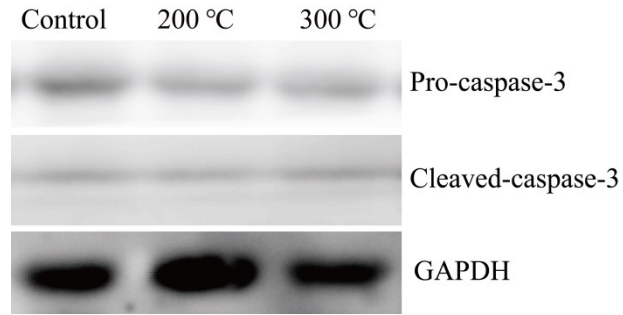

54

55 **Figure S3.** No increase of caspase-3 level was induced by the CDs from chicken breasts  
56 roasted at 200 or 300 °C, which were added in the NRK cells for 12 h, and the protein  
57 level of pro-caspase-3, cleaved-caspase-3 or GAPDH was tested by the method of  
58 western blot.

59
